# Supplementary material
Source: PubMed Central journal article supplement (PMC4019052)
Supplement: MCB.01729-13_zmb999100438so1.pdf [file MCB.01729-13_zmb999100438so1.pdf]

# KAP1 represses differentiation-inducible genes in embryonic stem cells through cooperative binding with PRC1 and derepresses pluripotency-associated genes

Bo Cheng<sup>1</sup>, Xiaojun Ren<sup>1</sup>, and Tom K Kerppola\*

Department of Biological Chemistry  
University of Michigan Medical School  
Ann Arbor, MI 48109-0650.

## Inventory of Supplemental Information

| Supplemental Fig.s                                                                                                                                                                                                        | Page |
|---------------------------------------------------------------------------------------------------------------------------------------------------------------------------------------------------------------------------|------|
| Fig. S1 .....                                                                                                                                                                                                             | 3    |
| Legend: Characterization of KAP1 interactions with PRC1                                                                                                                                                                   | 4    |
| Fig. S2.....                                                                                                                                                                                                              | 6    |
| Legend: Distributions of KAP1 and Ring1b ChIP-seq tags at differentiation-inducible versus pluripotency-associated genes and validation of KAP1 and Ring1b binding to the same regions.                                   | 9    |
| Fig. S3.....                                                                                                                                                                                                              | 11   |
| Legend: Effects of <i>KAP1<sup>fl/fl</sup></i> knockout during embryoid body formation on the level of KAP1 expression and on cell proliferation                                                                          | 12   |
| Fig. S4 .....                                                                                                                                                                                                             | 13   |
| Legend: Effects of stably expressed intact KAP1 and KAP1 $\Delta$ CC on PRC1 binding and on transcription at differentiation-inducible versus pluripotency-associated promoters upon <i>KAP1<sup>fl/fl</sup></i> knockout | 14   |
| <b>Supplemental Tables</b>                                                                                                                                                                                                |      |
| Table S1 Changes in transcript levels upon <i>KAP1<sup>fl/fl</sup></i> knockout and upon embryoid body formation                                                                                                          | 16   |
| Table S2 Characterization of ChIP-seq tag libraries                                                                                                                                                                       | 17   |
| Table S3 Genes bound by KAP1 and Ring1b identified by ChIP-seq analysis                                                                                                                                                   | 18   |
| Table S4 Promoters bound by KAP1 and Ring1b identified by ChIP-seq analysis                                                                                                                                               | 19   |
| Table S5 Sequences of primers used for ChIP-qPCR                                                                                                                                                                          | 20   |
| Table S6 Sequences of primers used for RT-qPCR                                                                                                                                                                            | 21   |
| <b>Supplemental Materials and Methods.....</b>                                                                                                                                                                            |      |
| Cell lines                                                                                                                                                                                                                | 23   |
| Plasmid expression vectors                                                                                                                                                                                                | 23   |
| BiFC analysis of KAP1 interaction with Cbx family proteins                                                                                                                                                                | 24   |
| Flow cytometry analysis of the specificity of BiFC complex formation                                                                                                                                                      | 24   |
| Antibodies                                                                                                                                                                                                                | 25   |
| Immunoprecipitation and immunoblotting                                                                                                                                                                                    | 25   |

|                                          |           |
|------------------------------------------|-----------|
| Analysis of transcript levels by RT-qPCR | 26        |
| Microarray analysis of transcript levels | 27        |
| Chromatin immunoprecipitation            | 27        |
| ChIP-seq analysis                        | 28        |
| Bioinformatic analysis of ChIP-seq data  | 29        |
| Differentiation of mouse ES cells        | 30        |
| <b>Supplemental References</b> .....     | <b>30</b> |

**A** maasaataaasaataasaasgspgsgesaggekrpaassaaasaasspaggggeaqellehcgvrerlrperdprrllpclhsacsacg  
 patpaaannsgdggsgadgamvdcpvckqqcyskdivenyfmrdskskssdsqdanqcctscednapatsycvecseplctcvea  
 hqrvkytkdhtvrstgpaktrdgertrvycnhkheplvlfcescdtltrdcqlnahkdhqyqfledavrnrqkllaslvkrlgdkhatlqk  
 ntkevrssirqvsvdqkrvqvdvkmailqimkelnkrgrvlnvdaqkvteggqerlerqhwtmtkiqkhqehilrfaswalesdnnta  
llskkliyfqlhralkmivdpvephgemkfqwdlnawtksaefgkivaerpgtntstgpgpmappragpplskqgsgssqpmevq  
egyfgsddpvyssaephvsgmkrsrsgegevsgllrkvprvslerldldltsdppvfkvfpgsttedynliviergaaaaagqagt  
 vppgagapplpgmaivkeeteaaigappaapegpetkpvlmlptegpgaegprlaspsgstssglevvapevtsapvsgpilds  
 aticrvckpgdlvmcnqcefcfhldchlpalqdvpgewscslchvlpdlkeedgslsldgadstgvvaklspanqrkcervllalfchep  
 crplhqlatdstfsmeqpggtldltlirarlqeklspvsspqefaqdvgrmfkqfnkltedkadvqsiiqlgrffetrmmndafgdtkfsa  
vlveppplnlpsaglsseqelspgdgp

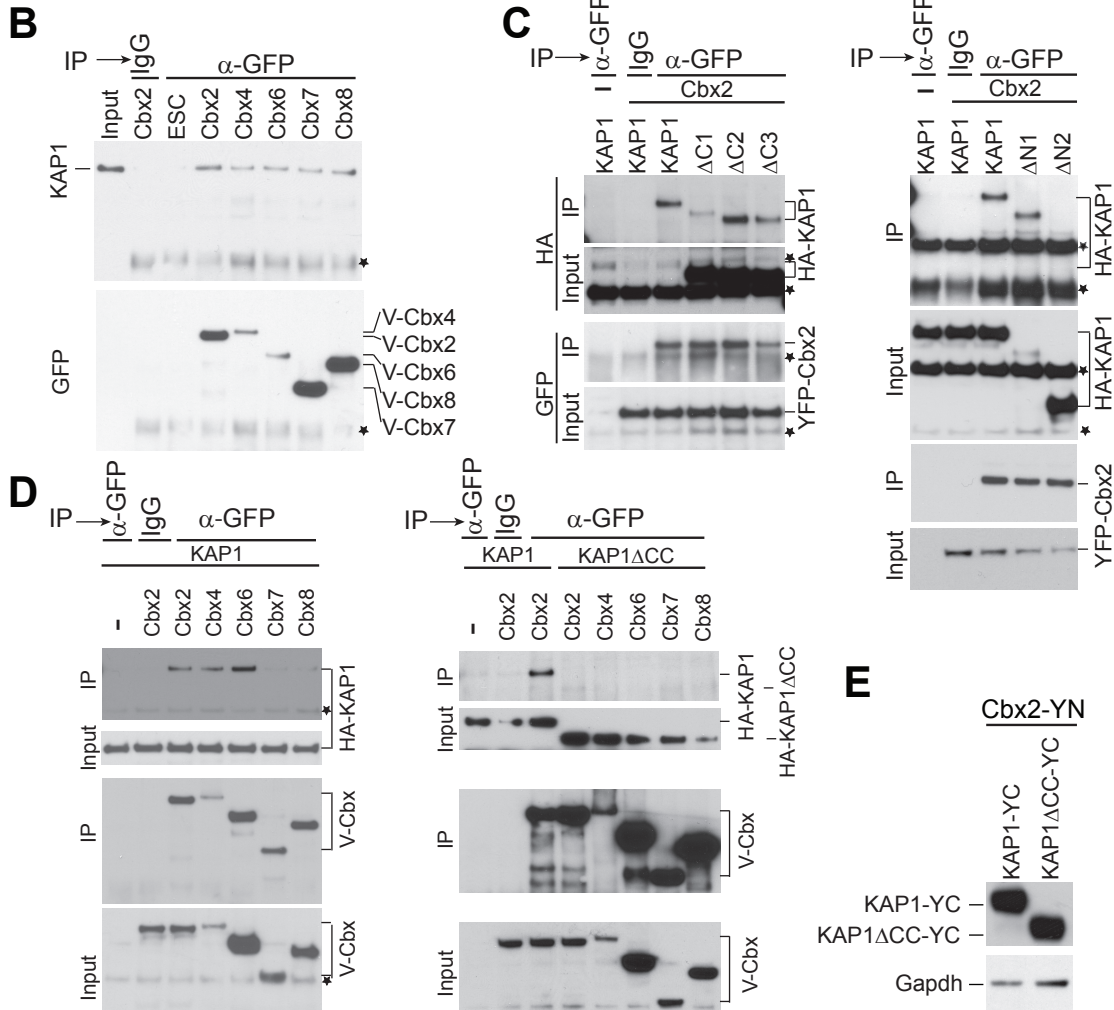

## **Fig. S1. Characterization of KAP1 interactions with PRC1**

**(A) KAP1 peptides identified by LC-MS/MS analysis of complexes purified in association with Cbx family proteins from ES cells.** Proteins that formed complexes with Cbx2 and Cbx7 were purified from ES cells by sequential affinity chromatography (1). The sequences of peptides generated by protease digestion of the co-purified proteins were determined by LC-MS/MS analysis

**Results:** 18 unique peptides corresponding to the sequence of KAP1 were detected in the fraction purified in association with Cbx 2 and 17 unique peptides were detected in the fraction purified in association with Cbx7. The sequences of peptides that correspond to the KAP1 protein are indicated in boldface and underlining in the amino acid sequence of KAP1. The peptide sequences identified by LC-MS/MS encompassed 39% of the complete KAP1 sequence.

### **(B) Endogenous KAP1 co-precipitation with different Cbx family proteins.**

Extracts of ES cells that stably expressed the Cbx family proteins indicated above the lanes fused to Venus (2) were incubated with anti-GFP antibodies or control IgG. The immunoprecipitates were analyzed by immunoblotting using anti-KAP1 as well as anti-GFP antibodies. ESC: parental ES cells. 5% of the total cell extracts were analyzed in parallel (Input). \* indicates cross-reactive bands.

**Results:** KAP1 co-precipitated with each of the CBX family fusion proteins that were expressed in ES cells. Differences in the levels of expression of different Cbx proteins could influence the relative efficiencies of KAP1 co-precipitation. Whereas KAP1 formed complexes with all PRC1 subunits examined in ES cells, these represent a small subset of all known PRC1 subunits (3).

**(C) Co-precipitation of KAP1 deletion derivatives with Cbx2.** The KAP1 deletion derivatives indicated above the lanes (see diagrams in Fig. 1D) fused to N-terminal HA were expressed transiently with YFP-Cbx2 in HEK293T cells. The cell extracts were incubated with anti-GFP or control (IgG) antibodies. The immunoprecipitates were analyzed by immunoblotting using anti-HA (upper blots) and anti-GFP (lower blots) antibodies. 5% of the cell extracts were analyzed in parallel (Input). \* indicates cross-

reactive bands.

**Results:** All of the KAP1 deletion derivatives that contained the coiled-coil domain co-precipitated with Cbx2. All of the KAP1 deletion derivatives in which the coiled-coil domain was deleted were precipitated with significantly lower or undetectable efficiencies. Deletion of the C-terminal half of the coiled-coil domain of KAP1 reduced, but did not eliminate its co-precipitation with Cbx2 (Fig. 1E,  $\Delta\text{CC}^{1/2}$ ). The coiled-coil domain was therefore required for KAP1 co-precipitation with Cbx2 when they were ectopically expressed in HEK293T cells.

**(D) Comparison of intact KAP1 and KAP1 $\Delta\text{CC}$  interactions with different Cbx family proteins.** Intact KAP1 or KAP1 $\Delta\text{CC}$  fused to an N-terminal HA epitope was expressed transiently with the Cbx family proteins indicated above the lanes fused to Venus in HEK293T cells. The cell extracts were incubated with anti-GFP ( $\alpha$ -GFP) or control (IgG) antibodies. The immunoprecipitates were analyzed by immunoblotting using anti-HA (upper blots) and anti-GFP (lower blots) antibodies. 5% of the cell extracts were analyzed in parallel (Input). \* indicates cross-reactive bands.

**Results:** KAP1 co-precipitated with Cbx proteins that were transiently expressed in HEK293T cells with different efficiencies. The differences in the efficiencies of KAP1 co-precipitation with different Cbx proteins from ES cells versus HEK293T cells could be due to differences in the levels of Cbx protein expression.

**(E) Comparison of the levels of intact KAP1 and KAP1 $\Delta\text{CC}$  BiFC fusion protein expression.** Extracts from HEK293T cells that were transiently transfected with plasmids encoding the fusion proteins indicated above the lanes were analyzed by immunoblotting using anti-KAP1 (upper blot) and anti-GAPDH (lower blot) antibodies.

**Results:** Intact KAP1 and KAP1 $\Delta\text{CC}$  fusion proteins were expressed at comparable levels.

**A**

**KAP1-repressed  
Differentiation-inducible**

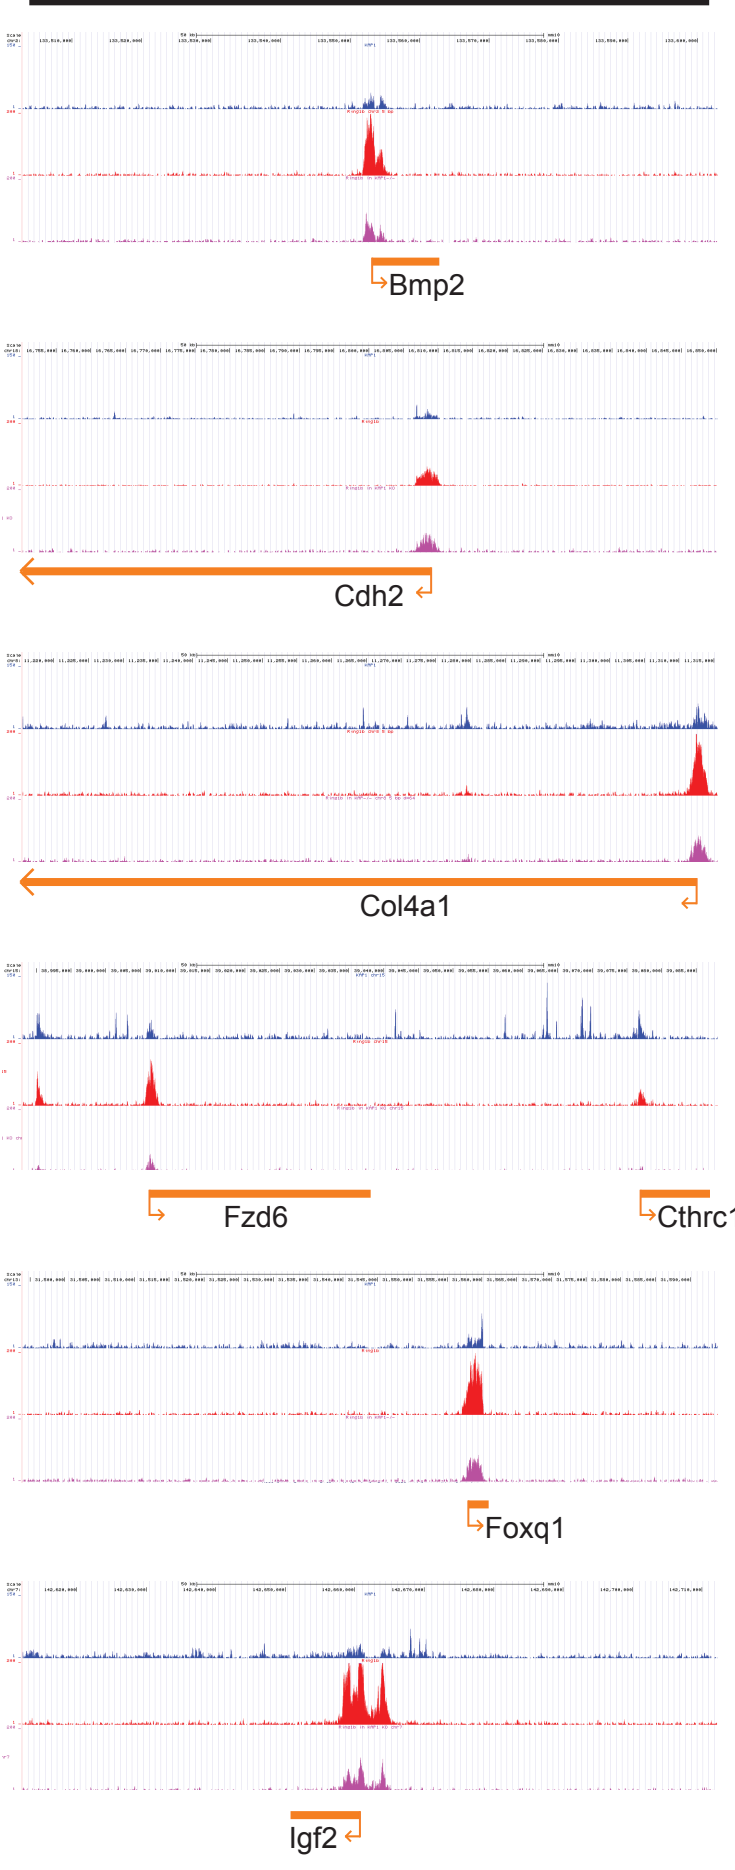

**KAP1-derepressed  
Pluripotency-associated**

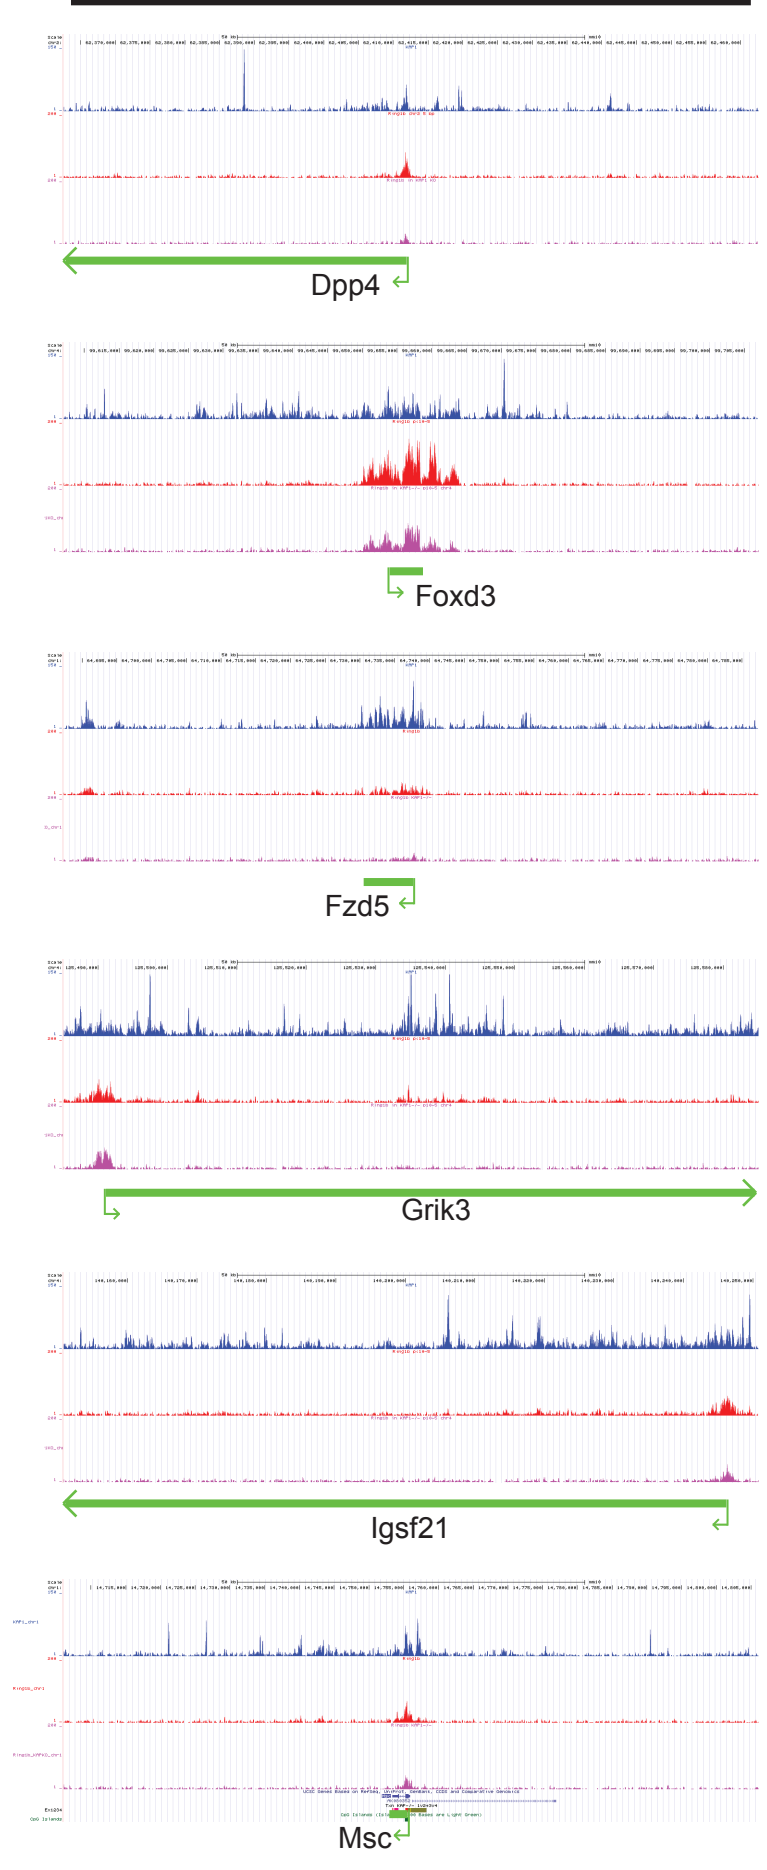

continued on next page

Differentiation-inducible

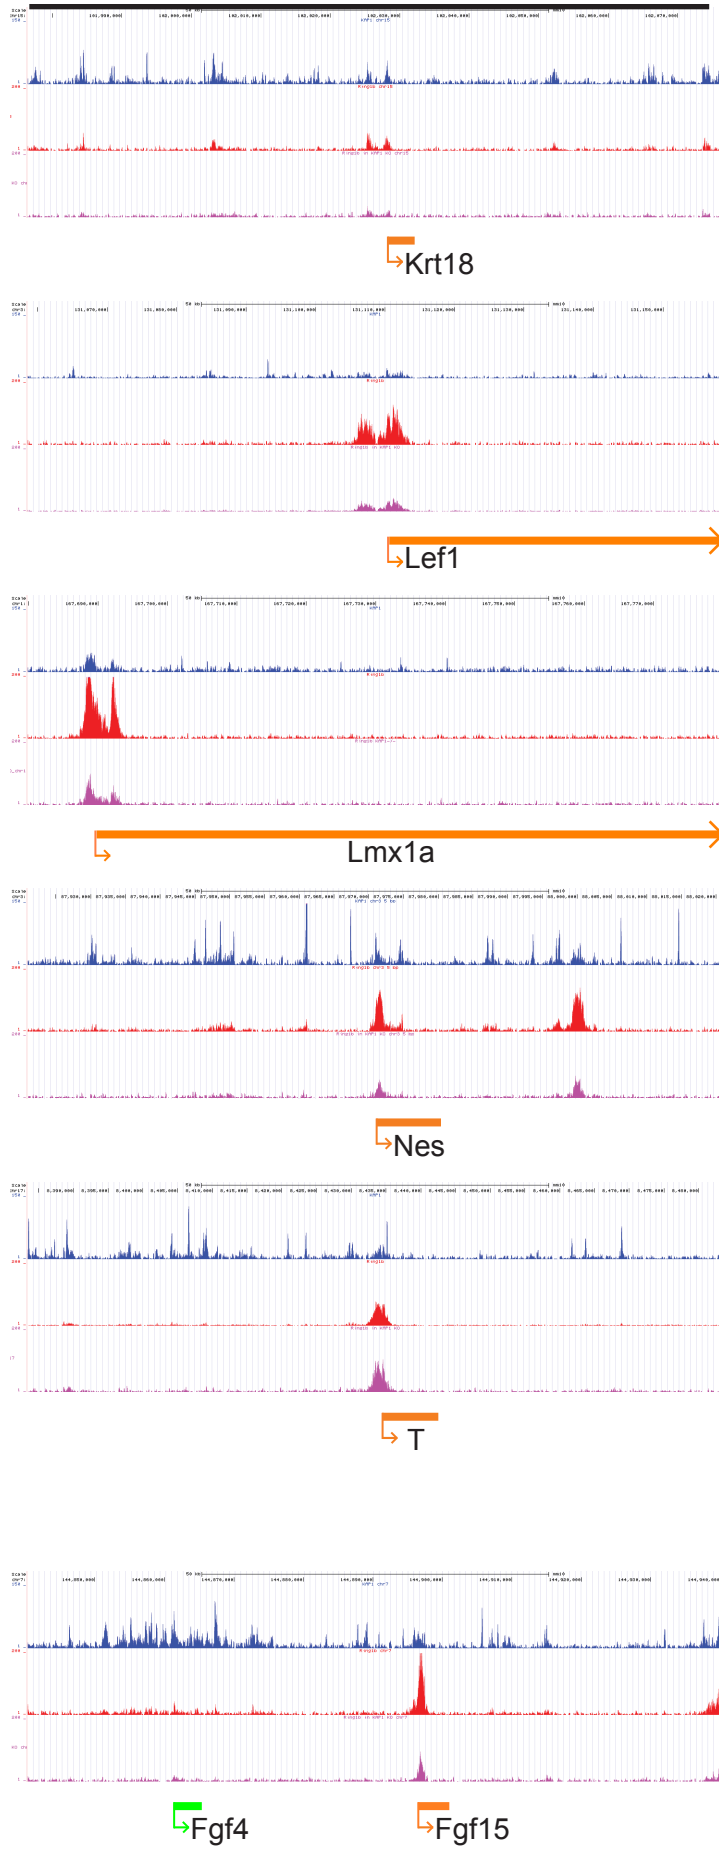

Pluripotency-associated

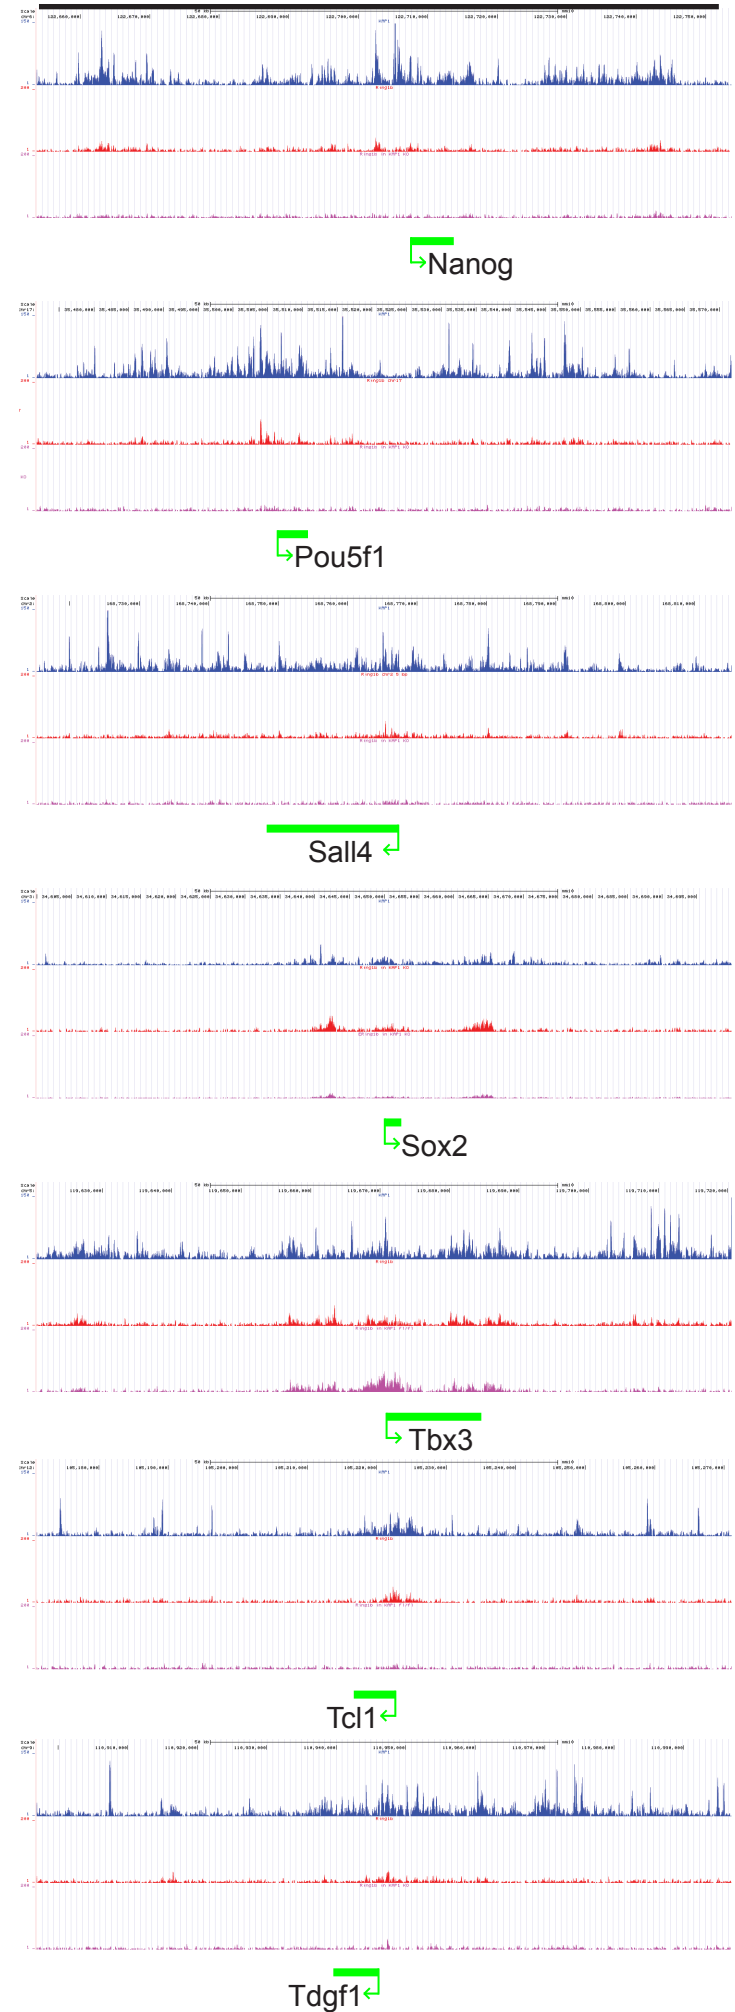

**B****KAP1 binding regions**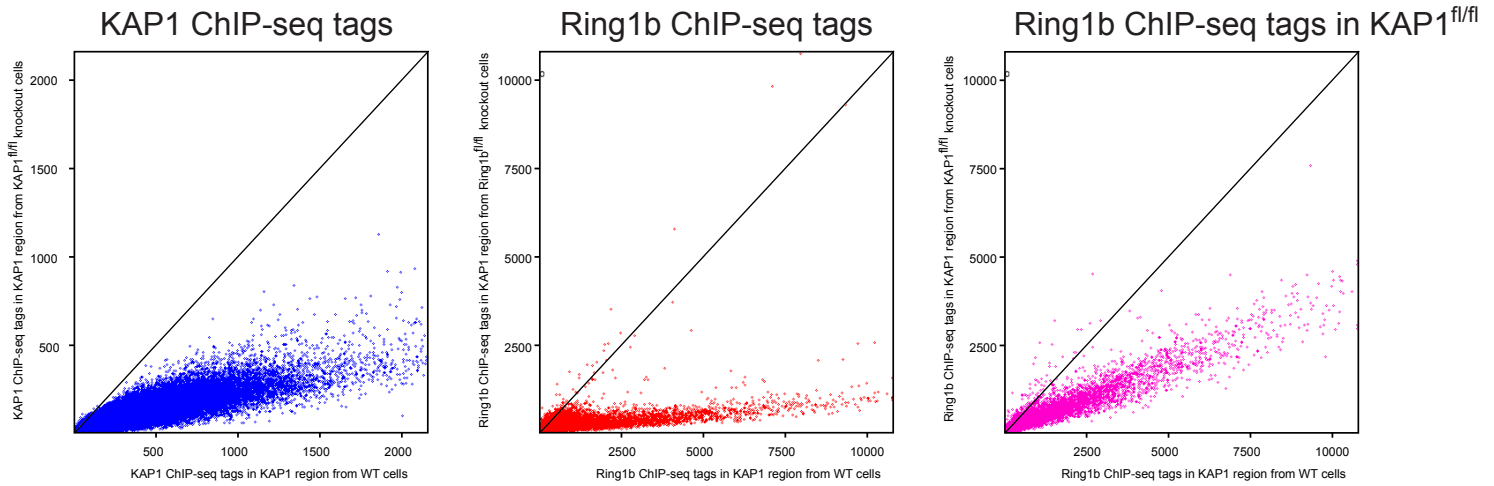**Ring1b binding regions**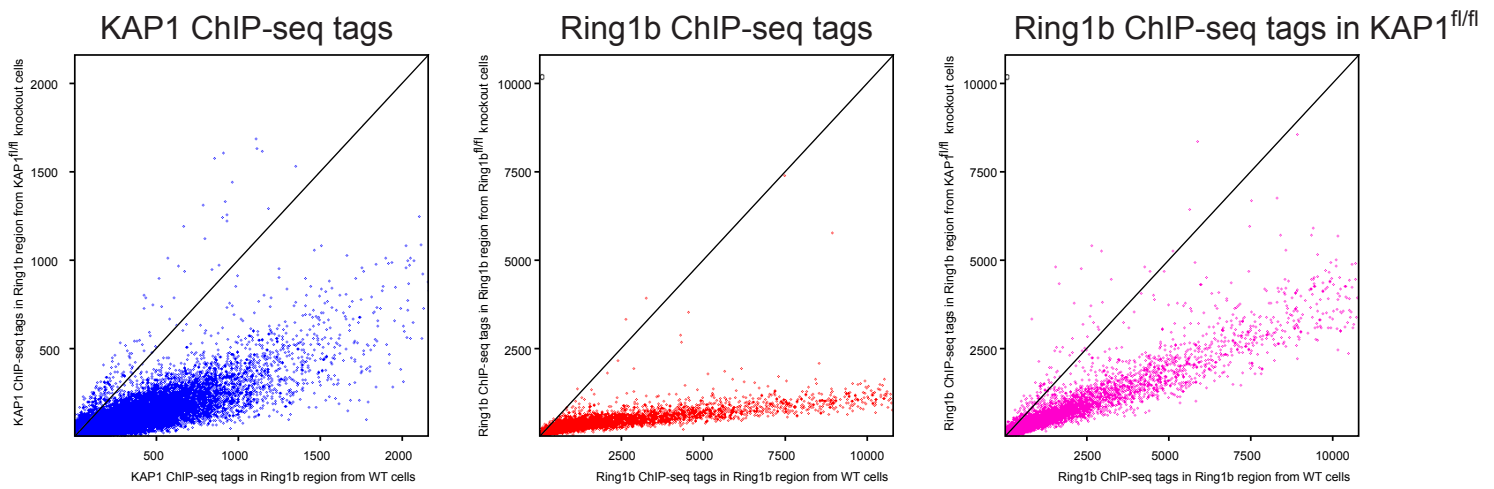



**Fig. S2. Distributions of KAP1 and Ring1b ChIP-seq tags at differentiation-inducible versus pluripotency-associated genes and validation of KAP1 and Ring1b binding to the same regions.**

**(A) ChIP-seq tag distributions at selected differentiation-inducible (left panels) and pluripotency-associated (right panels) genes.** The distributions of KAP1 (blue), Ring1b (red) and Ring1b in  $KAP1^{fl/fl}$  knockout (magenta) ChIP-seq tags are shown in genomic regions spanning the genes indicated below the tracks. Selected differentiation-inducible (orange) and pluripotency-associated (green) are shown. The ChIP-seq tag tracks are shown using the same scales encompassing 100,000 base pairs at each locus. The height of the tracks corresponds to 150 ChIP-seq tags for the KAP1 track and 200 ChIP-seq tags for both Ring1b tracks.

**Results:** The KAP1 and Ring1b ChIP-seq tags at differentiation-inducible genes (left panels) were concentrated near the transcription start sites and the level of Ring1b ChIP-seq tags was typically higher than the level of KAP1 ChIP-seq tags. At pluripotency-associated genes, KAP1 ChIP-seq tags were distributed throughout transcribed and flanking sequences and were generally more abundant than the Ring1b ChIP-seq tags.

Most of the genes whose transcription changed upon  $KAP1^{fl/fl}$  knockout were bound by both KAP1 and Ring1b. 16% of the differentiation-inducible genes and 2% of the pluripotency-associated genes contained no KAP1 or Ring1b binding regions. These could be regulated indirectly, or they could represent false negatives since the conditional  $KAP1^{fl/fl}$  and  $Ring1b^{fl/fl}$  knockout cells that were used as negative controls had residual KAP1 and Ring1b binding. Many differentiation-inducible promoters were bound predominantly by Ring1b, whereas a majority of pluripotency-associated promoters were bound predominantly by KAP1.

**(B) Analysis of KAP1 ChIP-seq tag enrichment in Ring1b binding regions and vice versa.** The ChIP-seq tag counts for KAP1 in  $KAP1^{fl/fl}$  knockout (blue), Ring1b in  $Ring1b^{fl/fl}$  knockout (red) and Ring1b in  $KAP1^{fl/fl}$  knockout (magenta) ChIP-seq tags were plotted as a function of the respective ChIP-seq tag counts from wild type (WT)

cells. The upper row of panels shows ChIP-seq tag counts in KAP1 binding regions. The lower row of panels shows ChIP-seq tag counts in Ring1b binding regions. The diagonal lines show the predicted ChIP-seq tag counts if *KAP1<sup>fl/fl</sup>* and *Ring1b<sup>fl/fl</sup>* knockout caused no changes in ChIP-seq tag levels (i.e. *KAP1<sup>fl/fl</sup>* and *Ring1b<sup>fl/fl</sup>* knockout have no effect on ChIP-seq tag counts).

**Results:** The KAP1 ChIP-seq tag counts in Ring1b binding regions and the Ring1b ChIP-seq tags in KAP1 binding regions reflected specific KAP1 and Ring1b binding since their levels were reduced in *KAP1<sup>fl/fl</sup>* knockout and in *Ring1b<sup>fl/fl</sup>* knockout cells, respectively. The Ring1b ChIP-seq tag counts decreased at a large majority of Ring1b and KAP1 binding regions upon *KAP1<sup>fl/fl</sup>* knockout, but they increased at a small number of binding regions.

**A**

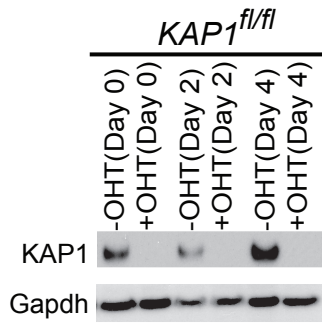

**B**

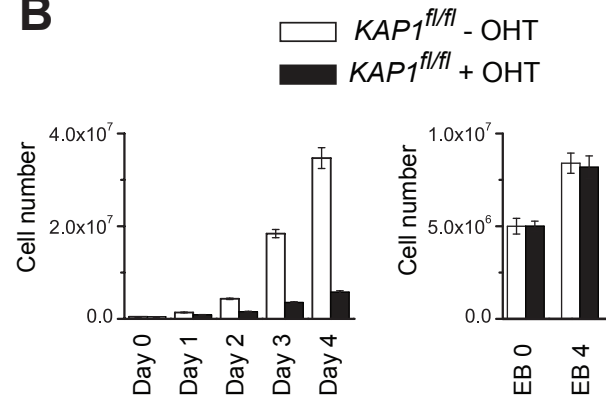

**Fig. S3. Effects of  $KAP1^{fl/fl}$  knockout during embryoid body formation on the level of KAP1 expression and on cell proliferation**

**(A) Effects of  $KAP1^{fl/fl}$  knockout during embryoid body formation on the levels of KAP1.** The level of KAP1 was measured by immunoblotting extracts from cells treated with tamoxifen (+OHT) either concurrent with the induction of differentiation (Day 0) or on Day 2 or Day 4 after the induction of differentiation (tamoxifen was removed after two days). The embryoid bodies were harvested and KAP1 expression was analyzed 8 days after the induction of differentiation.

**Results:** KAP1 was depleted with similar efficiencies in ES cells and during embryoid body formation.

**(B) Effects of KAP1 depletion before and after the induction of embryoid body differentiation on cell proliferation.** The number of cells was counted in cultures that were either untreated (-OHT; open bars) or treated (+OHT; solid bars) with tamoxifen before (left graph) and after (right graph) the induction of embryoid body differentiation. The tamoxifen was removed 24 hours after treatment.

**Results:** KAP1 depletion reduced ES cell proliferation, but had little effect on cell proliferation during embryoid body formation.

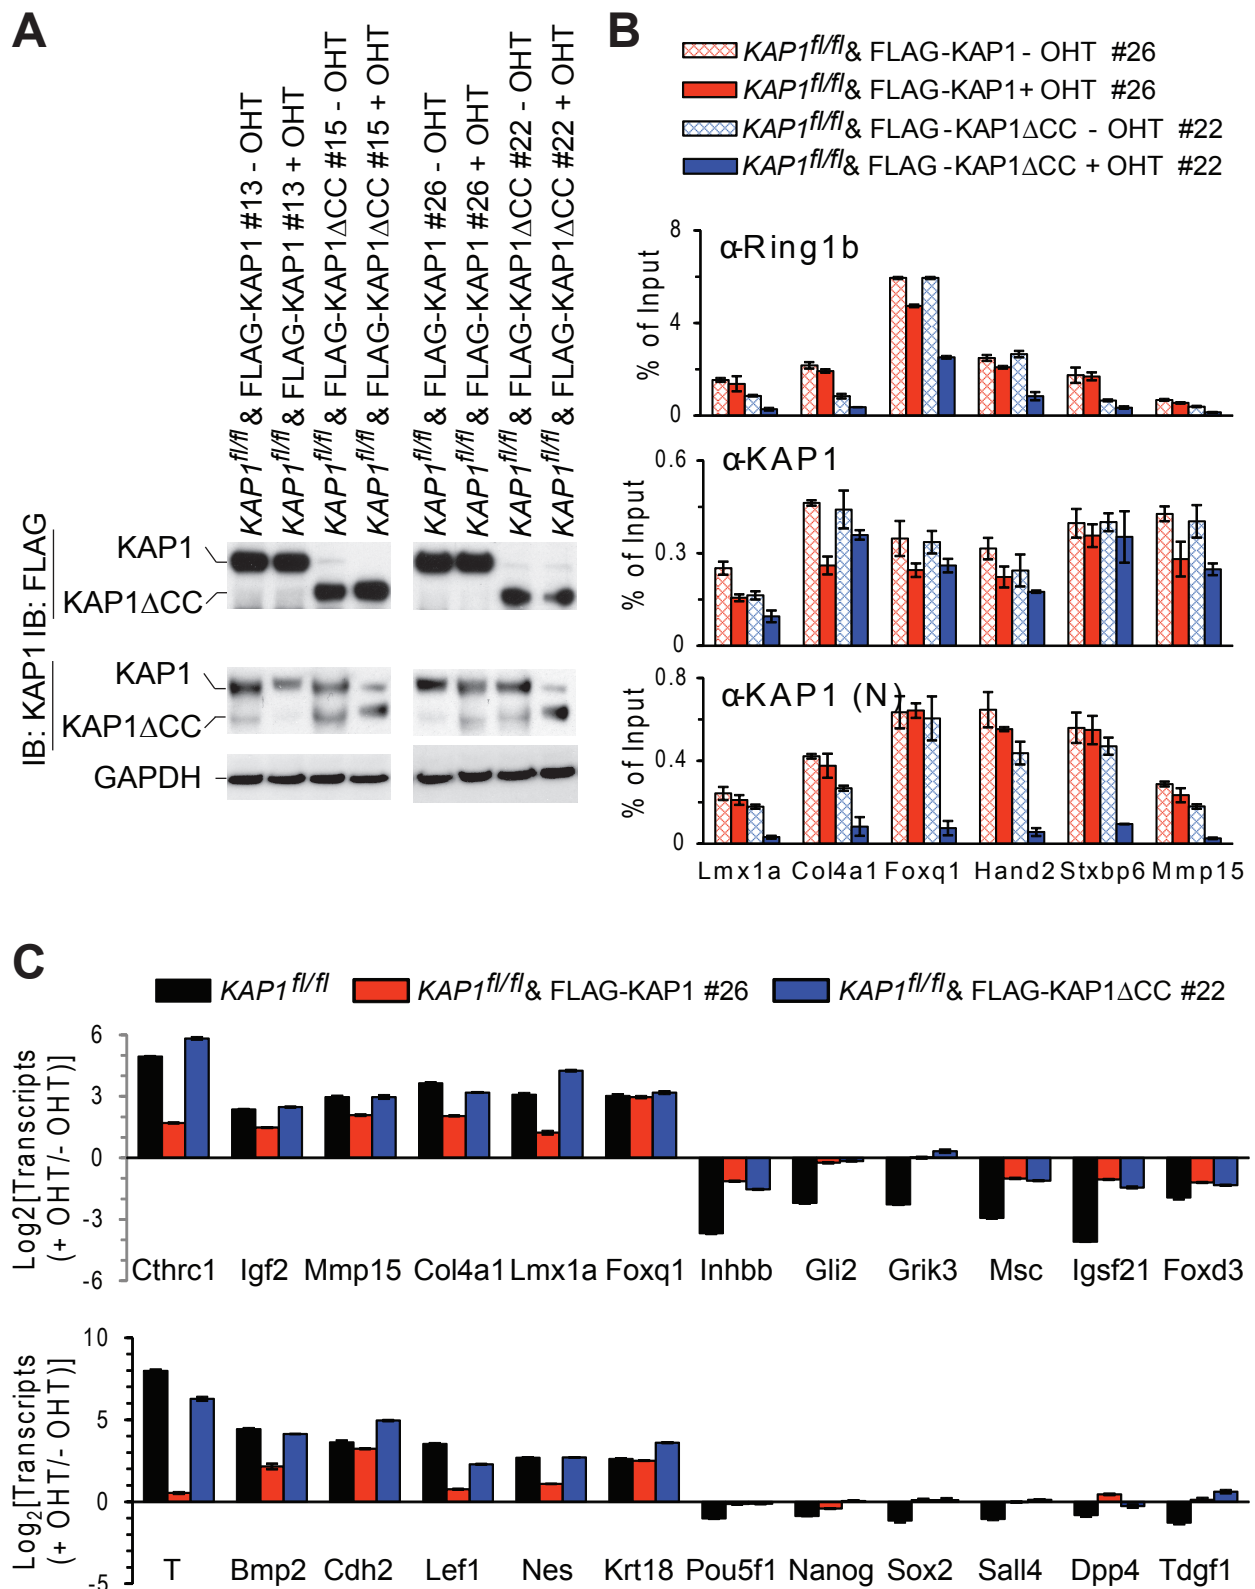

**Fig. S4. Effects of stably expressed intact KAP1 and KAP1 $\Delta$ CC on PRC1 binding and on transcription at differentiation-inducible *versus* pluripotency-associated promoters upon KAP1<sup>fl/fl</sup> knockout (related to Fig. 6)**

**(A) Comparison of the levels of intact KAP1 and KAP1 $\Delta$ CC expression in KAP1<sup>fl/fl</sup> cells untreated (-OHT) or treated (+OHT) with tamoxifen for 24 h followed by 48 h without tamoxifen.** We generated KAP1<sup>fl/fl</sup> ES cell lines that stably expressed intact KAP1 or KAP1 lacking the coiled-coil domain that was required for interaction with PRC1 (KAP1 $\Delta$ CC). Extracts of cells cultured in parallel with those used in the experiments shown in Figs 6A and S6B were analyzed by immunoblotting using the antibodies indicated to the left of the images. Note the difference in mobilities between endogenous KAP1 and KAP1 fused to the FLAG epitope.

**Results:** KAP1 and KAP1 $\Delta$ CC were expressed at levels comparable to endogenous KAP1 and to each other in several independent cell lines. Endogenous KAP1 was depleted with similar efficiencies in cells that expressed intact KAP1 and KAP1 $\Delta$ CC. The differences in the effects of intact KAP1 *versus* KAP1 $\Delta$ CC expression on PRC1 binding and on transcription at differentiation-inducible genes were therefore not due to differences between the levels of KAP1 and KAP1 $\Delta$ CC expression or in endogenous KAP1 depletion in these cells.

**(B) Effects of intact KAP1 and KAP1 $\Delta$ CC expression in KAP1<sup>fl/fl</sup> knockout cells on Ring1b binding at the promoters indicated below the bars.** The levels of Ring1b ( $\alpha$ -Ring1b), total KAP1 ( $\alpha$ -KAP1) and full-length KAP1 [ $\alpha$ -KAP1 (N) does not recognize KAP1 $\Delta$ CC] binding were measured at the promoters indicated below the bar graphs. The levels were compared in KAP1<sup>fl/fl</sup> cells that expressed no ectopic KAP1 (white and black), intact KAP1 (red; clone #26) or KAP1 $\Delta$ CC (blue; clone #22) and that were cultured in the absence (-OHT, open and checkered bars) or in the presence (+OHT, solid bars) of tamoxifen. The ChIP-qPCR signals were normalized using anti-H3 ChIP. The data shown represent the means and standard deviations of three replicate qPCR measurements and are representative of two experiments the were performed using different stable cell lines.

**Results:** Intact KAP1 and KAP1 $\Delta$ CC expression in ES cells had distinct effects on Ring1b binding at differentiation-inducible genes before and after endogenous *KAP1<sup>fl/fl</sup>* knockout. Endogenous KAP1 binding was depleted with similar efficiencies in cells that expressed intact KAP1 and KAP1 $\Delta$ CC upon *KAP1<sup>fl/fl</sup>* knockout, indicating that the differences in PRC1 binding and transcription were not due to differences in endogenous KAP1 binding.

**(C) Effects of intact KAP1 and KAP1 $\Delta$ CC expression in *KAP1<sup>fl/fl</sup>* knockout cells on the transcription of differentiation-inducible versus pluripotency-associated genes.** The changes in transcription of the genes indicated below the bars upon *KAP1<sup>fl/fl</sup>* cells knockout (+OHT/-OHT) were compared between *KAP1<sup>fl/fl</sup>* cells that expressed no ectopic KAP1 (black bars), intact KAP1 (red bars; clone #26) or KAP1 $\Delta$ CC (blue bars; clone #22). The transcript levels were normalized by the levels of Gapdh transcripts. The data shown represent the means and standard deviations of three replicate qPCR measurements and are representative of two experiments the were performed using different stable cell lines.

**Results:** We investigated the roles of the interaction between KAP1 and PRC1 in regulation of differentiation-inducible *versus* pluripotency-associated gene transcription. We compared the levels of these transcripts in *KAP1<sup>fl/fl</sup>* cells that expressed either intact KAP1 or KAP1 $\Delta$ CC before and after endogenous *KAP1<sup>fl/fl</sup>* knockout. Intact KAP1 expression repressed the differentiation-inducible and activated the pluripotency-associated genes examined. KAP1 $\Delta$ CC expression did not repress the differentiation-inducible genes whose transcription increased upon *KAP1<sup>fl/fl</sup>* knockout. In contrast, KAP1 $\Delta$ CC expression activated transcription of the pluripotency-associated genes whose transcription decreased upon *KAP1<sup>fl/fl</sup>* knockout. The coiled-coil domain of KAP1 was therefore required for the repression of differentiation-inducible gene transcription, but not for the activation of pluripotency-associated gene transcription.

**Suppctfjb[ Table 1. Changes in transcript levels upon KAP1<sup>fl/fl</sup> knockout and upon embryoid body formation**

---

This table is provided as a separate file in Microsoft Excel format



Suppctf]b[ Table 2. Characterization of ChIP-seq tag libraries

| Library designation         | Ring1b                        | <i>Ring1b<sup>fl/fl</sup></i> knockout | Ring1b in <i>KAP1<sup>fl/fl</sup></i> knockout | KAP1                        | <i>KAP1<sup>fl/fl</sup></i> knockout |
|-----------------------------|-------------------------------|----------------------------------------|------------------------------------------------|-----------------------------|--------------------------------------|
| ES cell line                | <i>Ring1b<sup>fl/fl</sup></i> | <i>Ring1b<sup>fl/fl</sup></i>          | <i>KAP1<sup>fl/fl</sup></i>                    | <i>KAP1<sup>fl/fl</sup></i> | <i>KAP1<sup>fl/fl</sup></i>          |
| Treatment                   | +Ethanol                      | +Tamoxifen                             | +Tamoxifen                                     | +Ethanol                    | +Tamoxifen                           |
| ChIP antibody               | anti-Ring1b                   | anti-Ring1b                            | anti-Ring1b                                    | anti-KAP1                   | anti-KAP1                            |
| DNA fragment size peak (bp) | 185                           | 177                                    | 183                                            | 174                         | 177                                  |
| Mapped ChIP-seq tags        | 146573447                     | 135028510                              | 132033045                                      | 152548205                   | 134162121                            |
| MACS shift model (d)        | 61                            |                                        | 59                                             | 69                          |                                      |
| Binding regions (p<10e-5)   | 13516                         |                                        | 5562                                           | 82750                       |                                      |

**Suppcthb[ Table 3. Genes bound by KAP1 and Ring1b identified by ChIP-seq analysis**

---

This table is provided as a separate file in Microsoft Excel format

**Suppctfjb[ Table 4. Promoters bound by KAP1 and Ring1b identified by CHIP-seq analysis**

---

This table is provided as a separate file in Microsoft Excel format

**Suppcfh]b[ Table 5. Sequences of primers used for ChIP-qPCR analyses**

| <b>Gene</b>  | <b>Left primer (5'-3')</b>    | <b>Right primer (5'-3')</b>    |
|--------------|-------------------------------|--------------------------------|
| Adamts8      | tctctggcacagtgaatggagaac      | tgtggctggatggtgaactcct         |
| Bhlhe22      | ccttcagtcggaagctct            | tgctgcatgaggatgtagt            |
| Bmi1         | tcctgaagtgacaaagacaag         | taactcgccagcctgacc             |
| Col4a1       | cctgatgggacagaactttggtca      | agcatcgtcatcttagcaccctga       |
| Cthrc1       | aactcaggagttgcggtctc          | gcagggtgacagtggtcaga           |
| Cyp1b1       | gcatctgcccagaaagcta           | ggctttaccctgggattgag           |
| Efna5        | agccactgcctccttctc            | gagcggacgcaaataaata            |
| Fgf15        | tgccctgcgctgcaactgagt         | tccactttctgcatgacacctc         |
| Fgf4         | tacctgctgggctcaaa             | tgtccctcgtgtctgctgca           |
| Foxd3        | aggaaggctggtgaagtga           | ggtcctcgacgcttctctac           |
| Foxq1        | tcaacgagtacctcatgggcaagt      | tgacgaaacagtcggtgagcgaga       |
| Fzd1         | ccatttgtcaatccctca            | gcctagaaaccggttgag             |
| Fzd6         | ctgtagaaccggccgaag            | aagcctattaactcggggagtc         |
| Gapdh        | atcctgtaggccaggtgatg          | aggctcaagggttttaagg            |
| Gli2         | tacagaggacgcggagga            | gcagtcctaaggacaccag            |
| Grik3        | ggggaggacaaagtccaa            | cgtatccagggtccctagcc           |
| Hand2        | tcctcaaaagcaagacaggag         | agcttgcaactcgaaggaa            |
| Igf2         | caagtgattaattatacgtttctg      | agaggcgggtaggctcac             |
| Igsf21       | cctatcgagccaaccag             | tctgggctgtaataggatgctc         |
| Inhbb        | gtcggtgccatttatccatc          | gccacttttgctacctcgaa           |
| Krt18        | cggaactcctgttctggtct          | ggtggagcgagttgtgaag            |
| Lhx1         | tgggcagtctgacacgcacac         | aagacgccaagagctcaggattc        |
| Lmx1a        | taagttgcaggagcaagtgggtga      | tcggatctgcaccgtaagtgatga       |
| Meis1        | tgggataagcctagcagacaa         | cttcagggtgtcgttgttg            |
| Mmp15        | tatccctgcctccagtcatttagc      | ctcgtcactcgtaaagcccacatt       |
| Msc          | agccagagaaaagcgagactg         | cgggtgacatgcctatt              |
| Ntrk2        | gggagtgaagctgtgatcct          | ccgcatcatcttcttattcc           |
| Ppm1l        | acggacgaagtgaagaccatcgtt      | agcacatcaagtcctccaagacga       |
| RLTR4-MM-int | cttgggtgaaaggacagaggaaggtcgag | ataaaatcagggtccttaggaggtgaacac |
| Sox1         | acaggaacgggagacttcgag         | ccactttctgggtctgaagc           |
| Stxbp6       | ctgggagcctttgcaagcaagtat      | tcctcctcccgttcaactcattt        |

**Suppctfjbj Table 6. Sequences of primers used for RT-qPCR analyses**

| <b>Gene</b>       | <b>Left primer (5'-3')</b> | <b>Right primer (5'-3')</b> |
|-------------------|----------------------------|-----------------------------|
| Adamts8           | agaggaatgtccaccaaacg       | gtgtggtgtaggcattatattctc    |
| Bhlhe22           | ccttcagtcggaagctct         | tgctgcatgaggatgtagt         |
| Bmi1              | aaaccagaccactcctgaaca      | tcttctctctcatctcattttga     |
| Bmp2              | gatctttaccggctccagtct      | tgggatgttctccagatgttc       |
| Cdh2              | ggtggaggagaagaagaccag      | ggcatcaggctccacagtat        |
| Col4a1            | ttaaaggactccaggaccac       | cccactgagcctgtcacac         |
| Cthrc1            | gtgaagcaaaaagcgctga        | tgctggtcctttagacacatt       |
| Cyp1b1            | acatcccaagaatacggctc       | tagacagttcctcaccgatg        |
| Dpp4              | gagcgcagaagagccgaagga      | acacattgggggtaggaaca        |
| Efna5             | gccaggccgagagtatttc        | caggaccttctccgtgttc         |
| Fgf15             | tgccctgcgctgcaactgagt      | tccactttctgccatgacacctc     |
| Fgf4              | tacctgctgggctcaaa          | tgtccctcgtgtctgcgtgca       |
| Foxd3             | aggaaggctggtgaagtgag       | ggctctgcagcgttctctac        |
| Foxq1             | ggcctcgaagactcctttct       | cccgctacttttaggataggg       |
| Fzd1              | acatcgcgtacaaccagacc       | gctcctcctgattcgtg           |
| Fzd6              | ttaagcgaaaccgcaagc         | ttggaaatgaccttcagccta       |
| Gapdh             | gccaaaagggtcatcatctc       | cacaccatcacaaacatgg         |
| Gli2              | tacagaggacgcggagga         | gcagtccctaaggacaccag        |
| Grik3             | cagaggattcacttccatgaca     | tacaacaccagtgccaact         |
| Hand2             | ccgacaccaaactctccaa        | gatccatgaggtaggcgatg        |
| Igf2              | caagtggattaattatacgtttctg  | agaggcgggtaggctcac          |
| Igsf21            | cctatcgcagccaaccag         | tctgggctgtaataggatgctc      |
| Inhbb             | gatcatcagctttgcagagaca     | tgcttcattagagacgaagaa       |
| KAP1(mouse&human) | accagccaaccagcggaaatgtga   | gagtcggtagccagctgatgca      |
| KAP1(mouse)       | cggaaatgtgagcgtgttctc      | cggtagccagctgatgcaa         |
| Krt18             | agatgacaccaacatcacaaagg    | cttcagacctggacttctc         |
| Lef1              | ccgtcagatgtcaactccaagcaa   | accctgatgggataaacaggct      |
| Lhx1              | tgggcagtctgacacgcacac      | aagacgccaagagctcaggattc     |
| Lmx1a             | cagcaacaggaccaacagaa       | cccactaccatttctgagc         |
| Meis1             | gacgctttaaagagagataaagatgc | catttctcaaaaatcagtgctaaga   |
| Mmp15             | ctaaagacgccgaagtgtacg      | gctgggtaggttagccataga       |
| Msc               | agctttcctcaactggacacg      | gtccagagaccacgaatgg         |
| Nanog             | cctccagcagatgcaagaactc     | cttcaaccactggttttctgcc      |
| Nes               | tcccttagtctggaagtggcta     | gggtctgcaagcgagagtt         |
| Ntrk2             | tgccgagtgctacaacctct       | gctcctcagcgtcttc            |
| Pou5f1            | gctcaccctggcggttctc        | ggccgcagcttacacatgttc       |
| Ppm1l             | ccagctgaaggaaaggaaga       | tggttaggattccctggac         |
| Sall4             | tcaccacgaaaggcaacctgaagg   | cattcaggacgctggtgtactggtt   |

**Suppcfh]b[ Table 6 cont. Sequences of primers used for RT-qPCR analyses**

| <b>Gene</b> | <b>Left primer (5'-3')</b> | <b>Right primer (5'-3')</b> |
|-------------|----------------------------|-----------------------------|
| Sox1        | acaggaacggagactcgag        | ccactttctgggtctgaagc        |
| Sox2        | caggagaacccaagatgcacaa     | attaagctcctgggtcgcaag       |
| Stxbp6      | agttattaactgccaatccaaaatta | tgactggtcacactatcagc        |
| T/Brachyury | gctctaaggaaccaccggtcatc    | atgggactgcagcatggacag       |
| Tbx3        | cagcactcgacctgtgaaaa       | attggctcttgacgcttc          |
| Tcl1        | acgcgtttctcatgctcac        | gaaaattgcaatgccagtcc        |
| Tdgf1       | cgcaactgtgaacatgatgttcgc   | gaaaggaagcttttcagggtcac     |

## Supplemental Materials and Methods

### Cell lines

*KAP1<sup>fl/fl</sup>* ES cells were provided by Didier Trono (School of Life Sciences, Ecole Polytechnique Fédérale de Lausanne (EPFL), Lausanne, Switzerland) and were cultured as described (4). *Ring1a<sup>-/-</sup>;Ring1b<sup>fl/fl</sup>;Rosa26::CreERT2* (5), *Ring1b<sup>fl/fl</sup>;Rosa26::CreERT2* (5), *Bmi1<sup>-/-</sup>Mel18<sup>-/-</sup>* (6), *Cbx2<sup>-/-</sup>* (7), *Cbx2#1*, *Cbx4#11*, *Cbx6#7*, *Cbx7#3* and *Cbx8#1* ES cell lines were described previously (2). *Cbx7<sup>-/-</sup>* ES cell lines were isolated from blastocyst embryos of *Cbx7<sup>tm1b/tm1b</sup>* mice generated by Cre-mediated recombination of *Cbx7<sup>tm1a/tm1a</sup>* mice obtained from the Wellcome Trust Sanger Institute. *P<sub>TRE</sub>-shMga* ES cells that conditionally expressed an shRNA targeting Mga were prepared by stable transfection of pTripZ that expressed an shRNA targeting Mga into pGK mouse ES cells. *KAP1<sup>fl/fl</sup>* & *KAP1* and *KAP1<sup>fl/fl</sup>* & *KAP1ΔCC* ES cells lines were generated by transfection of plasmids encoding intact KAP1 or KAP1ΔCC into *KAP1<sup>fl/fl</sup>* ES cells and selection for stable expression using G418. The levels of KAP1 and KAP1ΔCC proteins were determined by immunoblotting using anti-KAP1 and anti-FLAG antibodies. HEK293T cells were obtained from ATCC.

### Plasmid expression vectors

The GFP-HA-KAP1 expression vector containing the sequence encoding EGFP and the HA epitope fused to the N-terminus of the human KAP1 coding sequence under the control of the CMV promoter in the pEGFP-C1 vector was provided by Dr. Yael Ziv (The David and Inez Myers Laboratory for Cancer Genetics, Tel Aviv University) (8). The FLAG-HA-KAP1 expression vector was prepared by substituting the sequence encoding GFP by the FLAG epitope. Deletions in the FLAG-HA-KAP1 coding sequence were as follows: ΔC1, deletion of amino acids 785-836; ΔC2, deletion of amino acids (737-836); ΔC3, deletion of amino acids (615-836); ΔN1, deletion of amino acids (1-135); ΔN2, deletion of amino acids (1-381); ΔB1, deletion of amino acids (136-203); Δ(B1B2), deletion of amino acids (136-250); ΔCC<sup>1/2</sup>, deletion of amino acids (318-381); ΔCC, deletion of amino acids (251-381); Δ(B2CC), deletion of amino acids (204-381); ΔPxVxL, deletion of amino acids (381-615).

The KAP1 expression vectors for BiFC analysis were constructed by replacing the sequence encoding EGFP in GFP-HA-KAP1 by the sequence encoding the C-terminal 155 amino acids of the yellow fluorescent protein (YC). The expression vectors encoding full-length YFP or the N-terminal 172 amino acids of YFP (YN) fused to the N-termini of human CBX family proteins were described previously (2).

### **BiFC analysis of KAP interactions with Cbx family proteins**

Twenty-four hours before transfection, HEK293T cells were seeded at 30% confluence in cover glass chambers (Nalge Nunc International). Cells were co-transfected with 0.25 µg plasmids expressing VN-Cbx family proteins, 0.25 µg plasmids expressing YC-KAP1, and 0.5 µg pCDNA3(+) using 3 µL of Fugene 6, by following the manufacturer's protocol (Roche). Twenty-four hours after transfection, the medium was changed to DMEM lacking phenol red (Invitrogen). The epifluorescence images were acquired using an Olympus IX81 inverted fluorescence microscope equipped with a 60× water objective (numerical aperture, 1.2) and a Hamamatsu ER II charge-coupled device camera. BiFC fluorescence was excited using a 500/20 nm excitation filter and emission was detected using a 535/30 nm filter.

### **Flow cytometry analysis of the specificity of BiFC complex formation**

HEK293T cells were co-transfected in six-well plates with 0.5 µg plasmids expressing YN-Cbx family proteins, 0.5 µg plasmids expressing YC-KAP1 and mutants, and 0.1 µg Jun-CFP using 3.3 µl of FuGene6 as described above. Twenty-four hours after transfection, HEK293T cells were harvested using the citrate solution (135 mM KCl, 15 mM sodium citrate). Half of the cells were collected for determination of protein level by western blotting. The remaining cells were fixed with 3.7% formaldehyde for 10 min at room temperature, washed with PBS, and re-suspended in 250 µL of PBS containing 0.8% BSA. The fluorescence intensities were analyzed using a Beckton Dickinson FACSCanto™ II system. The BiFC and CFP signals were excited using 488-nm and 407-nm laser lines, respectively. The correction factors used to compensate for the cross-talk between YFP and CFP acquisition channels were determined using cells that expressed YFP and CFP separately. Threshold values were set to exclude 99% of non-



transfected cells. The mean fluorescence intensities of the BiFC complexes were normalized by the mean fluorescence intensities of co-expressed CFP fusions.

## **Antibodies**

The antibodies are described in or were obtained from the following sources: anti-KAP1 (Abcam, ab10484); anti-Ring1b (MBL, D139-3). anti-Mel18 (Santa Cruz, sc-10744); anti-Cbx2 (9); anti-Cbx7 (Abcam, ab21873) was used for endogenous IP in Fig. 1B and ChIP in Fig.s 5 and 6; anti-Cbx7 (9) was used for ChIP in Fig. 2; anti-Mga was raised against an Mga fragment fused to GST; anti-L3MBTL2 (10); Max (C-17, Santa Cruz, sc-197); E2F6 (Abcam, ab53061); anti-FLAG (Sigma, F3165); anti-Gapdh (Abcam, ab9484); anti-GFP (FitzGerald, 20R-GR011); anti-PanH3 (Abcam, ab1791); anti-H3K27Me3 (Upstate, 07-449); anti-H3K9Me3 (Upstate, 07-523); anti-H3K4Me3 (Millipore, 04-745).

## **Immunoprecipitation and immunoblotting**

For investigation of KAP1 and PRC1 subunit interactions, ES cell nuclear extracts were prepared by isolating nuclei from the wild type and mutant ES cells indicated and re-suspending them in nuclear extraction buffer (20 mM Tris-HCl, pH 7.5, 0.05% NP-40, 350 mM NaCl, 0.25 mM EDTA, 20% Glycerol, 0.1 mM Na<sub>3</sub>VO<sub>4</sub>, 0.1 mM PMSF, protein inhibitor cocktail tablet (Roche, 1 tablet in 7 ml of lysis buffer)). The suspension was rotated for 30 min at 4°C, and centrifuged at 12,000g for 30 min at 4°C. The extract was pre-cleared using protein G agarose beads.

To analyzed interactions among endogenous proteins, 1 ml nuclear extract was incubated with the antibodies or antisera indicated at 4°C overnight and 50 µL protein G beads were added and rotated for an additional 2 hours. The bound immunoprecipitated complexes were washed 5 times with buffer (50 mM Tris-HCl, pH 7.9, 0.1% NP-40, 150 mM NaCl, 0.25 mM EDTA, 0.1 mM PMSF). The proteins were resolved using NuPAGE 4-12% Bis-Tris Gel (Invitrogen) and were transferred to Immobilon membrane (Millipore). Specific proteins were detected using the antibodies indicated and ECL Plus (Amersham). The membranes were exposed to Hyperfilm (Amersham) and the films were scanned using a flatbed scanner.

To map the regions of KAP1 required for interaction with Cbx2, 10 µg of YFP-Cbx2 and 10 µg of FLAG-HA-KAP1 or mutants were transiently transfected into HEK293T cells grown on a 10-cm plate to 50% confluence using Fugene6 according to manufacturer instructions. 36–48 h after the transfection the cells were lysed in 1 ml of lysis buffer (20mM HEPES at pH 7.9, 150 mM NaCl, 0.25 mM EDTA, 0.1 mM PMSF, 0.5 % NP-40, 0.1 mM Na<sub>3</sub>VO<sub>4</sub>, 20% glycerol, and protein inhibitor cocktail tablet (Roche, 1 tablet in 7 ml of lysis buffer)). 1 ml of the cell extract was incubated with 5 µg of anti-GFP antibodies at 4°C overnight. The immune complexes were captured on 50 µL protein G beads and were washed five times with buffer (50 mM Tris-HCl, pH 7.9, 0.1% NP-40, 150 mM NaCl, 0.25 mM EDTA, 0.1 mM PMSF). The proteins were analyzed by immunoblotting using the antibodies indicated as described above. To investigate KAP1 interaction with different Cbx family proteins, the same procedure was used.

To analyze the specificity of the interaction between the coiled coil region of KAP1 and PRC1 subunits, nuclear extracts were prepared from ES cells that stably expressed FLAG-HA-KAP1 or FLAG-HA-KAP1 $\Delta$ CC as described above. The 1 ml nuclear extract was pre-cleared using protein G agarose beads, and incubated with anti-FLAG M2 beads (Sigma, A2220) at 4°C overnight. The immunoprecipitated complexes were washed 5 times with 50 mM Tris-HCl, pH 7.9, 0.1% NP-40, 150 mM NaCl, 0.25 mM EDTA, 0.1 mM PMSF. The proteins were analyzed by immunoblotting using the antibodies indicated as described above.

### **Analysis of transcript levels by RT-qPCR**

Total RNA was isolated from cells using the RNeasy Mini Kit (Qiagen). cDNA was synthesized using 1µg of total RNA using the Reverse Transcription System(Promega) with random primers according to the instructions provided by the manufacturer. qPCR was performed using Light Cycler 480 SYBR Green I Master (Roche) in a Light Cycler 480 II (Roche). Triplicate or quadruplicate PCR reactions were carried out for each sample. All transcript levels were normalized by the levels of Gapdh transcripts in the same samples. The sequences of the primers used for qPCR are shown in Table S6.

## Microarray analysis of transcript levels

Wild type and *KAP1<sup>fl/fl</sup>* ES cells were treated with tamoxifen for 24 h followed by 48 h culture without tamoxifen. Total RNA was isolated from cells using the RNeasy Mini Kit (Qiagen). The integrity of RNA was analyzed by RNA 6000 Nano Bioanalyzer. The transcripts were reverse transcribed and the labeled cDNAs were analyzed by hybridization to the Affymetrix Mouse Gene ST 1.1 array following the manufacturer's instructions. The changes in hybridization signals were quantified using software provided by Affymetrix.

## Chromatin Immunoprecipitation

Chromatin immunoprecipitation was performed by fixing the cells with 1.42% formaldehyde for 15 min and washing them sequentially with buffer LB1 (50 mM HEPES-KOH, pH 7.9, 140mM NaCl, 1 mM EDTA, 10% glycerol, 0.5% NP-40, 0.25% Triton X-100) and LB2 (10 mM Tris-HCl, pH 8.0, 200 mM NaCl, 1.5 mM EDTA) and LB3 (10 mM Tris-HCl, pH 8.0, 100 mM NaCl, 1.5 mM EDTA, 0.1% Na-Deoxycholate, 0.5% Na-Lauroylsarcosine). The chromatin was fragmented using Bioruptor (Diagenode) to produce chromatin fragments containing 100-1,000 bp DNA. After pre-incubation with protein G beads, antibodies (anti-KAP1, 5 µg; anti-Ring1b, 3 µg; anti-Cbx7, 10µl; anti-Mel18, 5 µg; anti-H3K27Me3, 5 µg; anti-H3K27Me9, 5 µg; anti-H3K27Me4, 5 µg; anti-H3, 5 µg) were added to 1 ml of fragmented chromatin and the precipitates were extensively washed. The immunoprecipitated DNA was quantified using LightCycler 480 SYBR Green I Master (Roche) with a LightCycler 480 II (Roche). Triplicate or quadruplicate PCR reactions were carried out for each sample. The efficiencies of chromatin immunoprecipitation were quantified relative to a standard curve prepared using input chromatin. The efficiencies of all ChIP assays were normalized by the efficiencies of ChIP using anti-H3 antibodies of the same samples performed in parallel. The sequences of the primers used for ChIP analysis are shown in Table S5.

## ChIP-Seq analysis

*Kap1<sup>fl/fl</sup>* and *Ring1b<sup>fl/fl</sup>* ES cells were treated with tamoxifen or ethanol for 48 hours and cultured an additional 48 hours without tamoxifen or ethanol. The number of cells in each culture was estimated by counting cells cultured in parallel under identical conditions. The cells were fixed using formaldehyde at a final concentration of 1.2% for 10 min at room temperature. Formaldehyde fixation was terminated by adding glycine to a final concentration of 125 mM for 10 min. The fixed cells were washed with cold PBS, collected by scraping and harvested by centrifugation at 2,000g for 5 min at 4°C.  $3 \times 10^7$  cells were suspended in 1 ml LB1 (50 mM Hepes-KOH, pH 7.9, 140mM NaCl, 1 mM EDTA, 10% glycerol, 0.5% NP-40, 0.25% Triton X-100) and were rocked at 4°C for 10 min. Cells were pelleted by centrifugation at 1,350g at 4°C for 5 min. The pellets were suspended in 1 ml LB2 (10 mM Tris-HCl, pH 8.0, 200 mM NaCl, 1.5 mM EDTA) and rocked at room temperature for 10 min. After centrifugation, the pellets were suspended in 1 ml of LB3 (10 mM Tris-HCl, pH 8.0, 100 mM NaCl, 1.5 mM EDTA, 0.1% Na-Deoxycholate, 0.5% Na-Lauroylsarcosine). The chromatin was sonicated until a size distribution with a maximum at 200 bp was reached using a Bioruptor (Diagenode). After sonication, Triton X-100 was added to a concentration of 1%. The mixture was centrifuged at 20,000g for 10 min at 4°C. To the lysates, BSA and tRNA were added to obtain the final concentrations of 1 mg/ml and 0.25 mg/ml, respectively. After pre-clearing with agarose beads, antibodies (anti-KAP1, 5 µg, anti-Ring1b, 3 µg, and anti-H3, 5 µg [served as a control to test for any variability in preparation of ChIP samples and construction of sequencing libraries]) were added to 1 ml of fragmented chromatin and the mixtures were rotated at 4 °C for overnight. Agarose beads were added to the mixture and the reaction was rotated at 4 °C for an additional 3 h. The beads were washed 5 times with 1 ml of RIPA buffer (50 mM Hepes-KOH, pH 7.9, 0.5 M LiCl, 0.5 M EDTA, 1.0% NP-40, 0.7% Na-Deoxycholate). After transferring the beads to a new tube, they were washed once with 1 ml of TE buffer containing 50 mM NaCl. The immunoprecipitated chromatin was eluted with elution buffer (50 mM Tris-HCl, pH8.0, 10 mM EDTA, 1.0% SDS) and the cross-links were reversed by addition of RNase A and Proteinase K at final concentrations of 0.2 µg/ml each. After phenol: chloroform

extraction, the DNAs were precipitated and dissolved in Qiagen Buffer EB (10 mM Tris•HCl, pH8.5).

The sequencing libraries were constructed by following the instructions provided by Illumina. Briefly, the immunoprecipitated DNA ends were repaired. After dA addition and adaptor ligation, gel electrophoresis was performed and DNAs ranging in size from approximately 100-300 bp were recovered. The recovered DNAs were subjected to PCR amplification using primers provided by Illumina. After purification, the variability of the entire process for preparing samples was tested by qPCR quantification of DNA precipitated by H3. The levels of DNA precipitated by anti-H3 antibody from tamoxifen-treated cells were the same as those precipitated from ethanol-treated cells, suggesting that preparation of the ChIP samples and construction of libraries did not introduce variability into the analysis. The DNA concentrations of the libraries were quantified using a Qubit 2.0 Fluorometer and the size distributions were determined using a Agilent 2100 Bioanalyzer. The DNA library was sequenced by Illumina Genome Analyzer at the University of Michigan Medical School DNA Sequencing Core Facility.

### **Bioinformatic analysis of ChIP-seq data**

The ChIP-seq tags were mapped to the mouse genome (mm10) using Bowtie2 with default settings. The tags were also mapped to mouse genome (mm9) with similar results. The coverage of tags in genes whose transcription increased or decreased upon *KAP1<sup>fl/fl</sup>* knockout as well as in annotated promoters was determined using ngs.plot.r v. 1.64. The regions with significant enrichment of KAP1 and Ring1b ChIP-seq tags were determined using MACS14 with default settings ( $p < 10^{-5}$ ). The overlap between genes and promoters bound by KAP1 and Ring1b as well as those that whose transcription increased or decreased upon *KAP1<sup>fl/fl</sup>* knockout were determined using Bedtools v. 2.16.2. Promoters were defined as sequences within 1 kb from a transcription start site annotated in RefSeq Genes as of 2013-05-28. Genes were defined as RefSeq Genes together with 1 kb of flanking sequences. Overlapping promoters and genes were merged. The distributions of ChIP-seq tags were plotted using the UCSC genome browser.

## Differentiation of mouse ES cells

Embryoid bodies (EB) were formed by seeding  $2.0 \times 10^6$  ES cells into 10 cm BD Falcon™ Petri Dishes made of polystyrene (Bacteriological Petri Dish, Cat. 351029) in ES cell medium without LIF. Tamoxifen (1  $\mu$ M, from Sigma) was added to the medium at different times as indicated in the Fig. legends for a period of two days. The medium was changed every two days. Embryoid bodies were collected at 4 and 8 days after inducing differentiation and transcript levels were quantified as described.

## Supplemental References

1. **Ren X, Kerppola TK.** 2011. REST interacts with Cbx proteins and regulates polycomb repressive complex 1 occupancy at RE1 elements. *Mol Cell Biol* **31**:2100-2110.
2. **Ren X, Vincenz C, Kerppola TK.** 2008. Changes in the Distributions and Dynamics of Polycomb Repressive Complexes During Embryonic Stem Cell Differentiation. *Mol Cell Biol* **28**:2884-2895.
3. **Gao Z, Zhang J, Bonasio R, Strino F, Sawai A, Parisi F, Kluger Y, Reinberg D.** 2012. PCGF Homologs, CBX Proteins, and RYBP Define Functionally Distinct PRC1 Family Complexes. *Mol Cell* **45**:344-356.
4. **Rowe HM, Jakobsson J, Mesnard D, Rougemont J, Reynard S, Aktas T, Maillard PV, Layard-Liesching H, Verp S, Marquis J, Spitz F, Constam DB, Trono D.** 2010. KAP1 controls endogenous retroviruses in embryonic stem cells. *Nature* **463**:237-240.
5. **Endoh M, Endo TA, Endoh T, Fujimura YI, Ohara O, Toyoda T, Otte AP, Okano M, Brockdorff N, Vidal M, Koseki H.** 2008. Polycomb group proteins Ring1A/B are functionally linked to the core transcriptional regulatory circuitry to maintain ES cell identity. *Development* **135**:1513-1524.
6. **Elderkin S, Maertens GN, Endoh M, Mallery DL, Morrice N, Koseki H, Peters G, Brockdorff N, Hiom K.** 2007. A phosphorylated form of mel-18 targets the Ring1B histone H2A ubiquitin ligase to chromatin. *Molecular Cell* **28**:107-120.
7. **Katoh-Fukui Y, Tsuchiya R, Shiroishi T, Nakahara Y, Hashimoto N, Noguchi K, Higashinakagawa T.** 1998. Male-to-female sex reversal in M33 mutant mice. *Nature* **393**:688-692.
8. **Ziv Y, Bielopolski D, Galanty Y, Lukas C, Taya Y, Schultz DC, Lukas J, Bekker-Jensen S, Bartek J, Shiloh Y.** 2006. Chromatin relaxation in response to DNA double-strand breaks is modulated by a novel ATM- and KAP-1 dependent pathway. *Nat Cell Biol* **8**:870-876.

9. **Vincenz C, Kerppola TK.** 2008. Different polycomb group CBX family proteins associate with distinct regions of chromatin using nonhomologous protein sequences. *Proc Natl Acad Sci U S A* **105**:16572-16577.
10. **Trojer P, Cao Alina R, Gao Z, Li Y, Zhang J, Xu X, Li G, Losson R, Erdjument-Bromage H, Tempst P, Farnham Peggy J, Reinberg D.** 2011. L3MBTL2 Protein Acts in Concert with PcG Protein-Mediated Monoubiquitination of H2A to Establish a Repressive Chromatin Structure. *Molecular Cell* **42**:438-450.
